# Supplementary material
Source: PubMed Central journal article supplement (PMC3605997)
Supplement: supp_M029801_jlr.M029801-1.pdf [file supp_M029801_jlr.M029801-1.pdf]

**Supplementary Table 1.****Primers used for real time qPCR**

| <b>Gene</b>      | <b>Accession number</b> | <b>Forward/reverse primers</b> |
|------------------|-------------------------|--------------------------------|
| <i>Tgfa</i>      | NM_031199               | 5'-CCATCAGTCTACCCTTTGC         |
|                  |                         | 5'-GGAGAAGGTACACAGCG           |
| <i>Tgfβ1</i>     | NM_011577               | 5'-GGCTACCATGCCAACTT           |
|                  |                         | 5'-ACCCACGTAGTAGACGA           |
| <i>Hgf</i>       | NM_010427               | 5'-AAATGAGAATGGTTCTTGGTG       |
|                  |                         | 5'-CTGGCCTCTTCTATGGCT          |
| <i>Cyclin A2</i> | NM_009828               | 5'-GGCTGACACTCTTTCCG           |
|                  |                         | 5'-CTGGTAGCAAGAATTAGAGCAT      |
| <i>Cyclin B1</i> | NM_172301               | 5'-AGCAAATATGAGGAGATGTACC      |
|                  |                         | 5'-CGACTTTAGATGCTCTACGGA       |
| <i>Cyclin D1</i> | NM_007631               | 5'-TCCCAGACGTTCCAGAACC         |
|                  |                         | 5'-AGGGCATCTGTAATACT           |
| <i>Cyclin E1</i> | NM_007633               | 5'-TGCACCAGTTTGCTTATGTT        |
|                  |                         | 5'-CCGTGTCGTTGACATAGG          |
| <i>FoxM1</i>     | NM_008021               | 5'-CTTACTGCCCTTTCCTCG          |
|                  |                         | 5'-GAACACTATCAGAGAAACACCTAAT   |
| <i>p21</i>       | NM_007669               | 5'-GGTTCCTTGCCACTTCTT          |
|                  |                         | 5'-GAGTCGGGATATTACGGTTG        |
| <i>Lrat</i>      | NM_023624               | 5'-AGTTCAAGACTAGCCTGCTCA       |
|                  |                         | 5'-TACAAGCTGGCCTTCGAC          |
| <i>Cyp26A1</i>   | NM_007811               | 5'-AGAGCAATCAAGACAACAAGTTAG    |
|                  |                         | 5'-ATCGCAGGGTCTCCTTAAT         |
| <i>Crbpl</i>     | NM_011254               | 5'-AATGAGAGCTGAGGGTG           |
|                  |                         | 5'-GGTATGCGTTTCGGTCC           |
| <i>Rarβ</i>      | NM_011243               | 5'-CAAGTTCAAGTGGAATATAGCAGA    |
|                  |                         | 5'-ACTGACTGACTCCACTGTT         |
| <i>Bcmo1</i>     | NM_021486               | 5'-ATGAAATGTGGAGAAGACTTCTAT    |
|                  |                         | 5'-CTTTGTCCACGACGGAT           |
| <i>Bcmo2</i>     | NM_133217               | 5'-AGGACCAGGGCTGTATTGTG        |
|                  |                         | 5'-CGCTGGCTGAAGAATAGGAC        |

|                |           |                                  |
|----------------|-----------|----------------------------------|
| <i>Ppara</i>   | NM_011144 | 5'-ACTGGATGACAGTGACATTTTC        |
|                |           | 5'-CTCCTGCAACTTCTCAATGTAG        |
| <i>Pparβ/δ</i> | NM_011145 | 5'-GGGTCAGAAGCTAGACAGCGAG        |
|                |           | 5'-AGAAAGAACAGCTATGGTCCAGTTCC    |
| <i>Pparγ</i>   | NM_011146 | 5'-TCTCCAGCATTTCTGCTCCACAC       |
|                |           | 5'-CAGGTTCTACTTTGATCGCACTTTGGTAT |
| <i>Cb1</i>     | NM_007726 | 5'-CGTGTTCACCCGAAAGATAGTC        |
|                |           | 5'-GTACCTGTCGATGGCCGT            |
| <i>Cb2</i>     | NM_009924 | 5'-TGTGGGTCTCTCAGCATTGATT        |
|                |           | 5'-CCAGCCCAGTAGGTAGTCGTT         |
| <i>Pdk4</i>    | NM_013743 | 5'-TCGAACTCTTCAAGAATGCC          |
|                |           | 5'-GGTCAGTAATCCTCAGAGGAACA       |
| <i>αSma</i>    | NM_007392 | 5'-TCTGGCACCACTCTTTCTATAAC       |
|                |           | 5'-TAGCCACATACATGGCGG            |
| <i>Col1A1</i>  | NM_007742 | 5'-CCTCAGAAGAACTGGTACATCA        |
|                |           | 5'-GGCCTCGGTGGACATTA             |
| 18S            |           | 5'-CCATCCAATCGGTAGTAGCG          |
|                |           | 5'-GTAACCCGTTGAACCCCAT           |

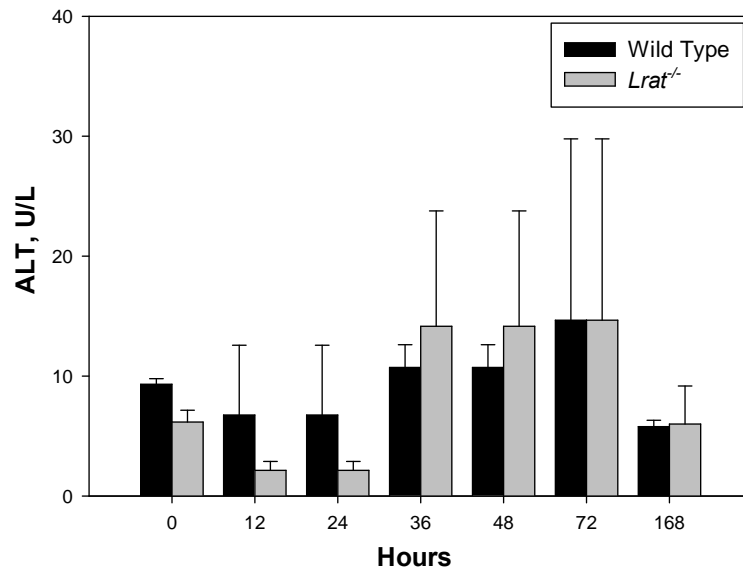

**Supplementary Figure 1. Serum alanine aminotransferase (ALT) activity for wild type and *Lrat*<sup>-/-</sup> mice following sham operation.** Values are given as the mean  $\pm$  1 S.D., n = 10 for each time and genotype.

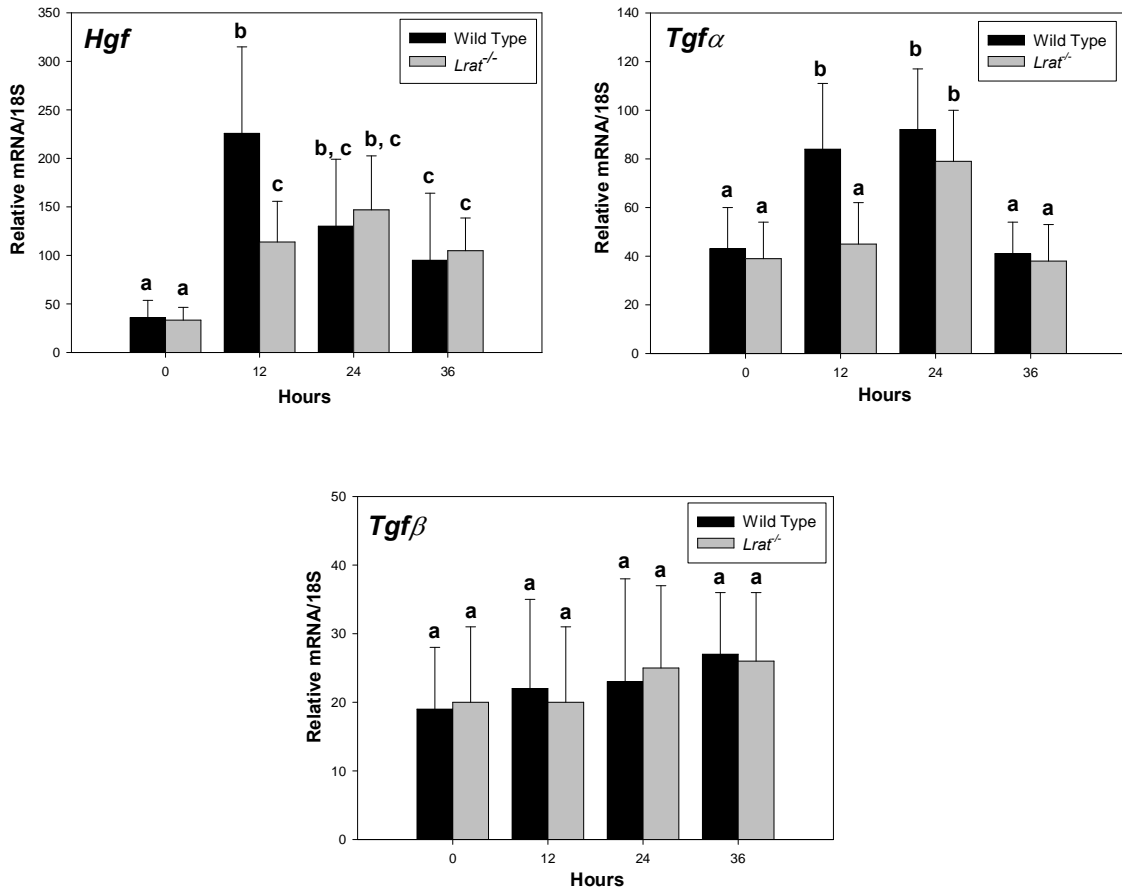

**Supplementary Figure 2. *Hgf*, *Tgfa* and *Tgf $\beta$*  mRNA expression in the livers of wild type and *Lrat*<sup>-/-</sup> mice following PHE.** Values are given as the mean  $\pm$  1 S.D., n = 10 for each genotype. Values marked with different letters (a, b, c) are significantly different,  $P < 0.05$ .

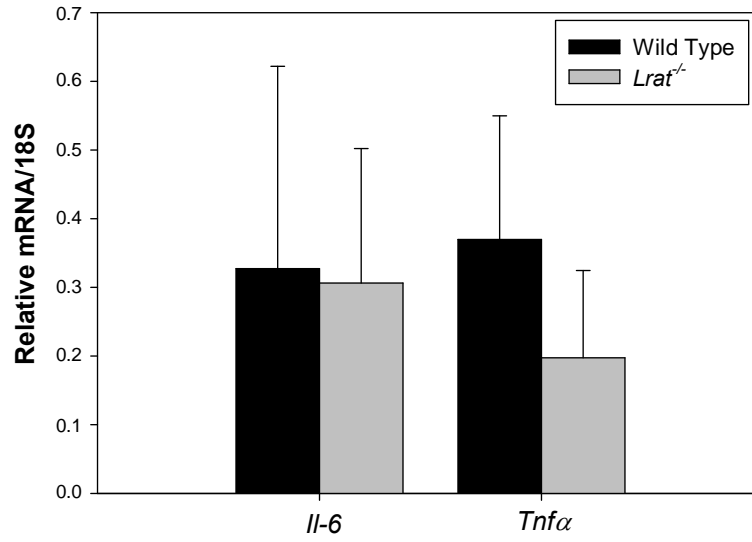

**Supplementary Figure 3. *Il-6* and *Tnfa* mRNA expression in the livers of wild type and *Lrat*<sup>-/-</sup> mice 12 h following PHE.** Values are given as the mean ± 1 S.D., n = 10 for each genotype.

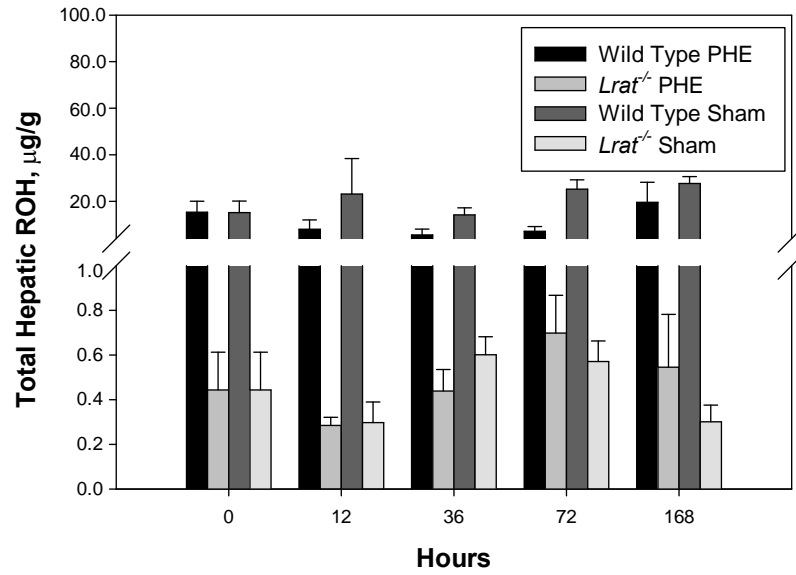

**Supplementary Figure 4. Hepatic retinol levels in wild type and *Lrat*<sup>-/-</sup> mice following PHE and sham operation.** Values are given as the mean  $\pm$  1 S.D., n = 10 for each time and genotype.

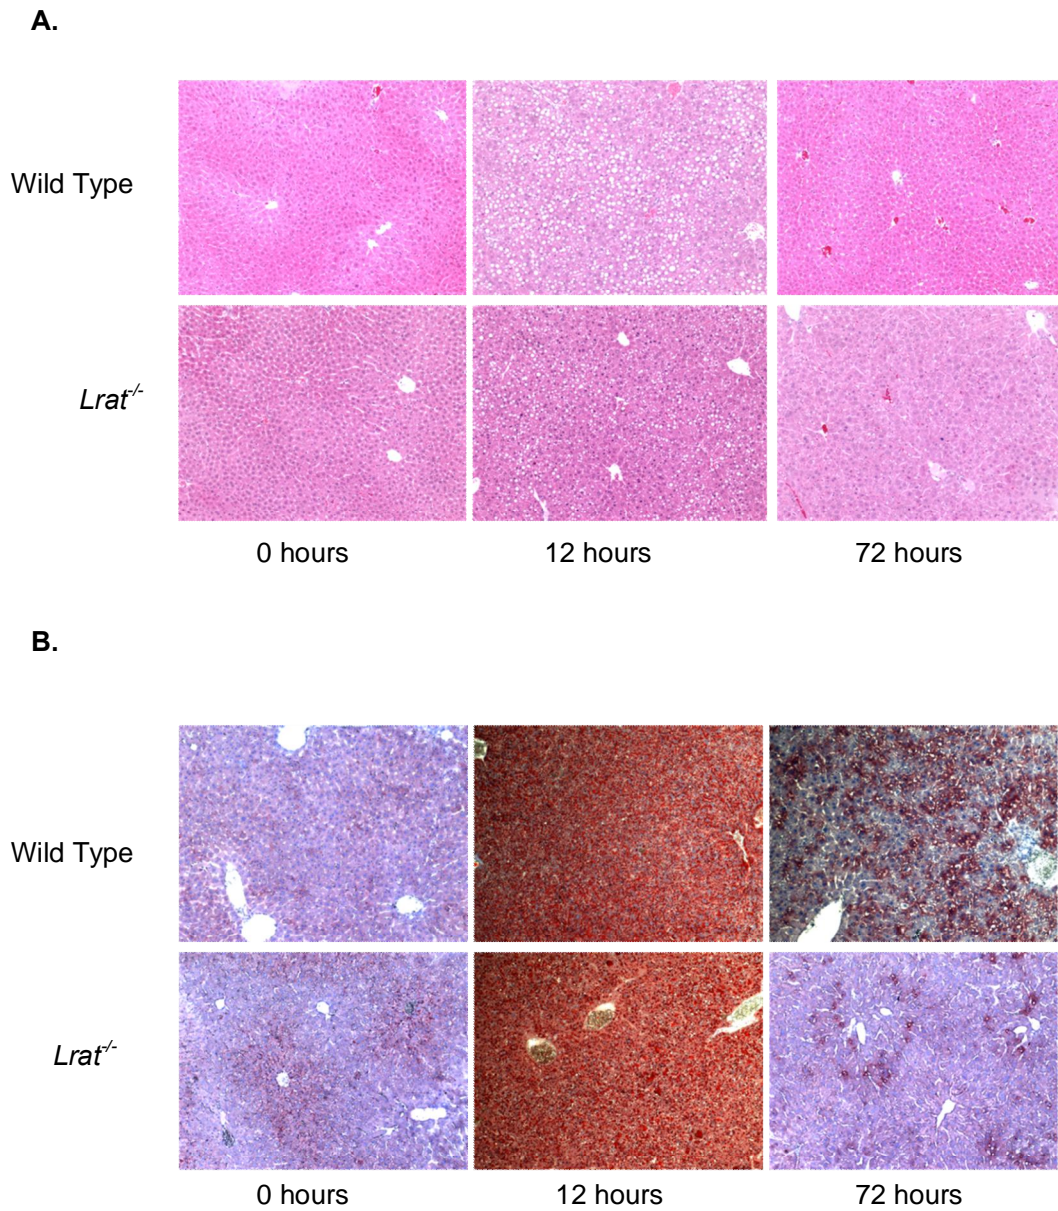

**Supplementary Figure 5. Hepatic triglyceride accumulation in livers of wild type and *Lrat*<sup>-/-</sup> mice following PHE. Panel A.** Representative H&E stained liver sections from wild type and *Lrat*<sup>-/-</sup> mice, 0, 12, and 72 h after PHE. **Panel B.** Representative oil red O stained liver sections from wild type and *Lrat*<sup>-/-</sup> mice, 0, 12, and 72 h after PHE.

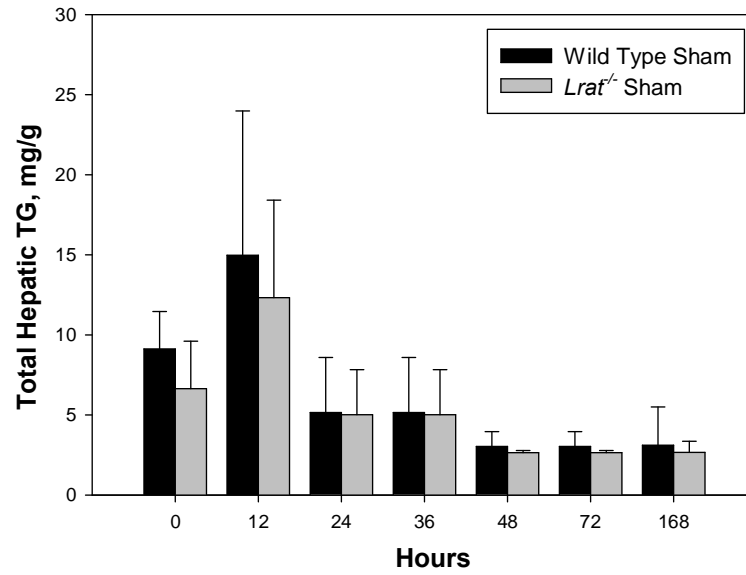

**Supplementary Figure 6. Hepatic triglyceride concentrations for wild type and *Lrat*<sup>-/-</sup> mice following sham operation.** Values are given as the mean  $\pm$  1 S.D., n = 10 for each time and genotype.



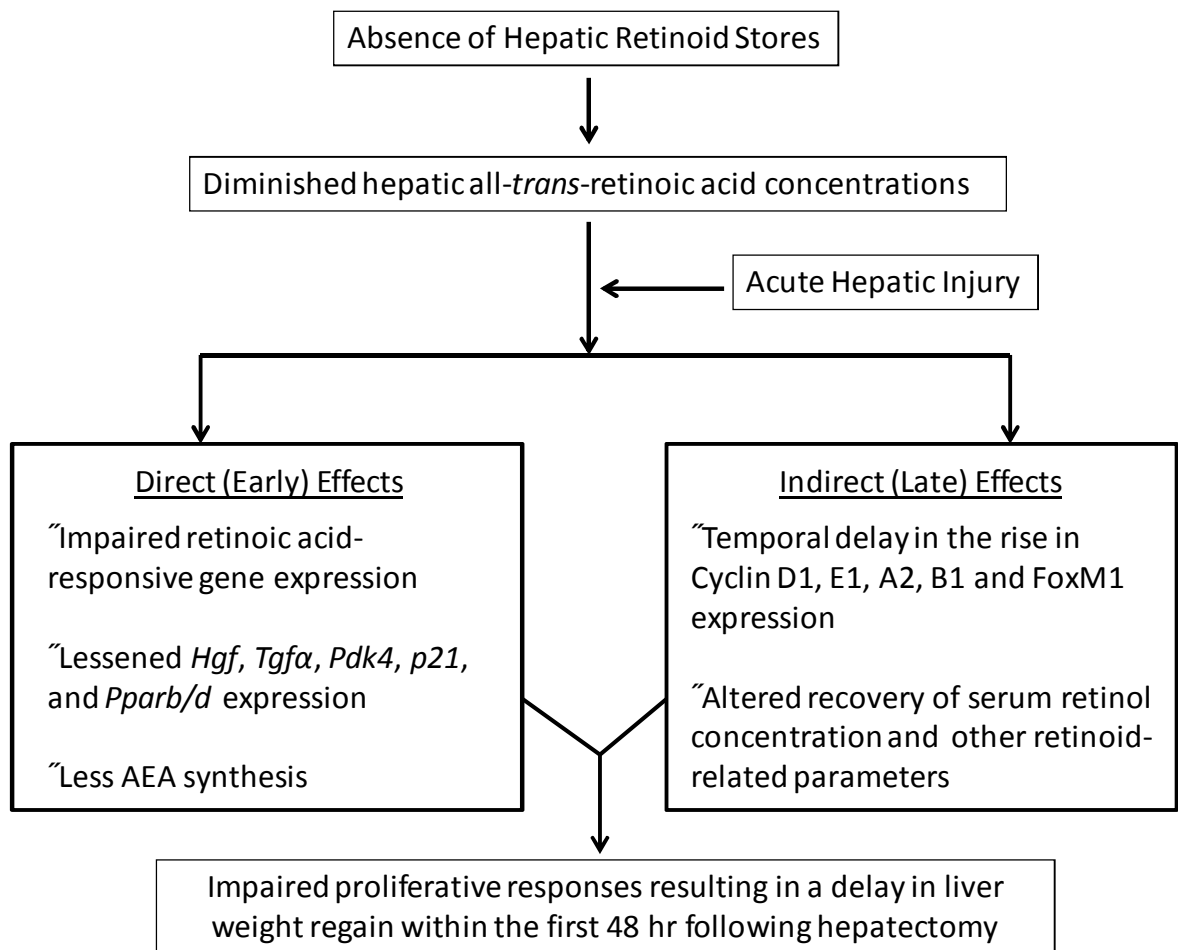

**Supplementary Figure 7. Summary of the effects identified in *Lrat*<sup>-/-</sup> mice which give rise to impaired liver regeneration.**

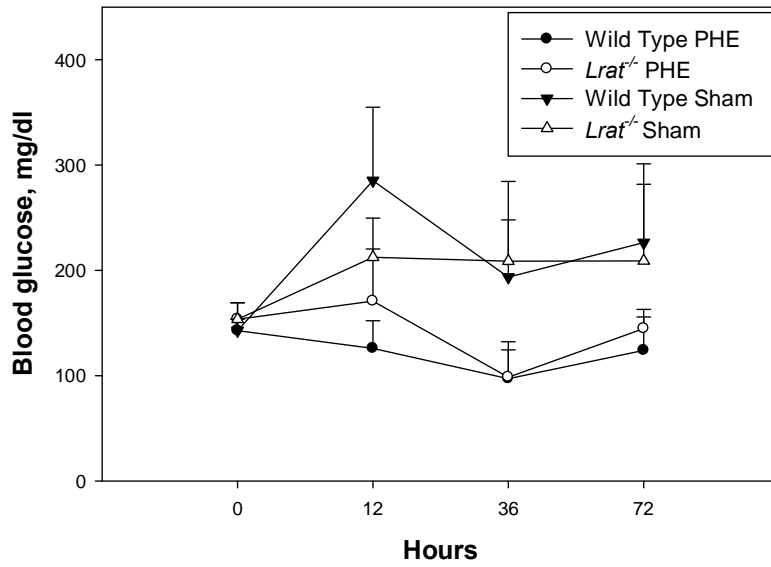

**Supplementary Figure 8. Blood glucose levels in wild type and *Lrat*<sup>-/-</sup> mice following PHE and sham operation.** Values are given as the mean  $\pm$  1 S.D., n = 10 for each time and genotype.
